# Supplementary material
Source: publisher site journal article supplement (https://www.dovepress.com/article/533676)

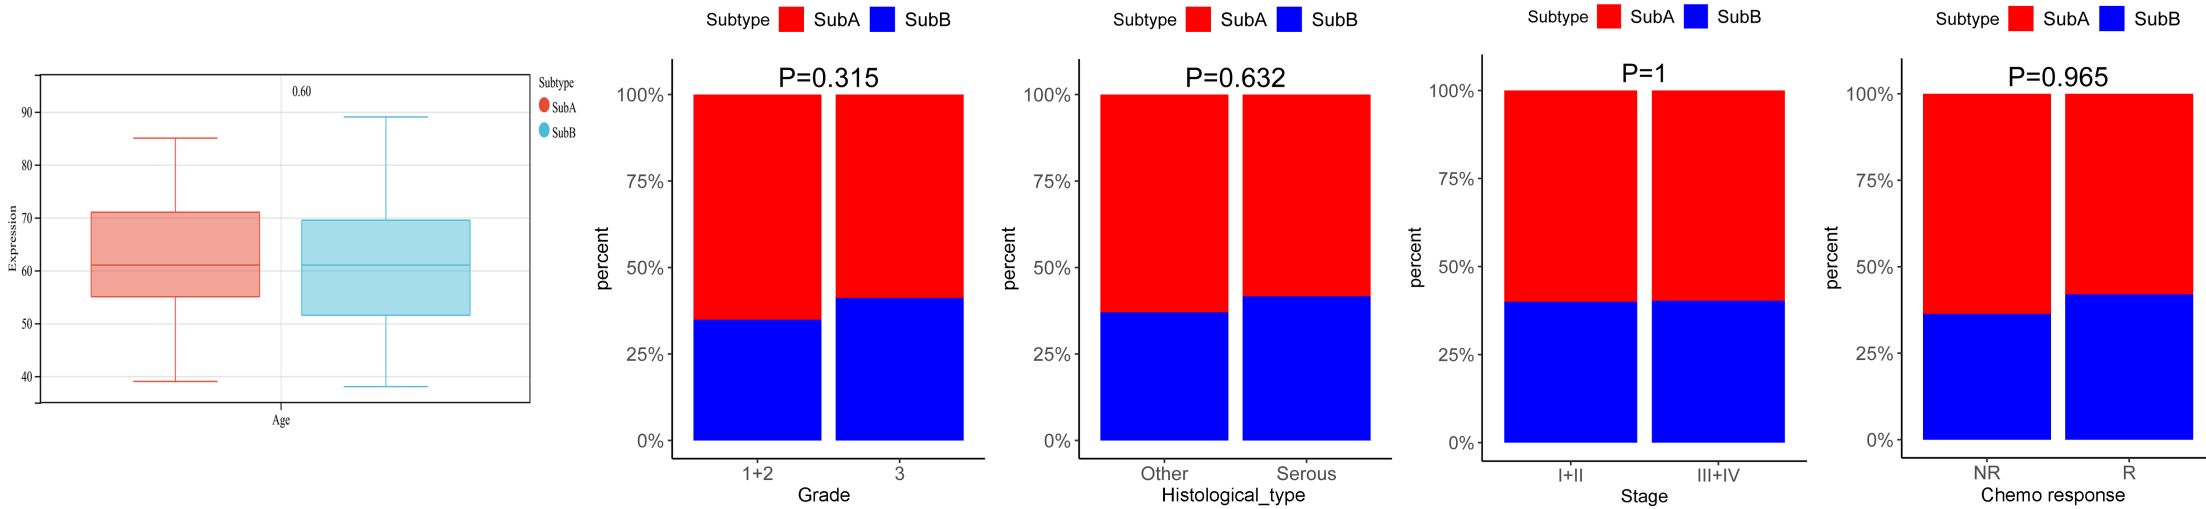

Supplementary Figure 1 Clinical data of OC patients with different subtypes

Supplement: Supplementary file 1 [file 533676%20Supplementary%20Material.pdf]
